# Supplementary material for: Self-Assembly and Multifaceted Bioactivity of a Silver(I) Quinolinate Coordination Polymer
Source: PubMed Central journal article supplement (PMC8527454; doi:10.1021/acs.inorgchem.1c02110), 2021-09-21
Supplement: ic1c02110_si_001.pdf [file ic1c02110_si_001.pdf]

## Supporting Information

# Self-Assembly and Multifaceted Bioactivity of a Silver(I)-Quinolate Coordination Polymer

Sabina W. Jaros <sup>†</sup>, Agnieszka Krogul-Sobczak <sup>‡</sup>, Barbara Bażanów <sup>#</sup>, Magdalena Florek <sup>#</sup>,  
Dominik Poradowski <sup>§</sup>, Dmytro S. Nesterov <sup>⊥</sup>, Urszula Śliwińska-Hill <sup>||</sup>, Alexander M. Kirillov <sup>⊥,^,\*</sup>  
and Piotr Smoleński <sup>†,\*</sup>

<sup>†</sup> Faculty of Chemistry, University of Wrocław, F. Joliot-Curie 14, 50-383 Wrocław, Poland.

<sup>‡</sup> Faculty of Chemistry, University of Warsaw, Pasteura 1, 02-093 Warsaw, Poland.

<sup>#</sup> Department of Pathology, Wrocław University of Environmental and Life Sciences, Norwida 31, 50-375 Wrocław, Poland.

<sup>§</sup> Department of Biostructure and Animal Physiology, Wrocław University of Environmental and Life Sciences, Koźuchowska 1, 51-631 Wrocław, Poland.

<sup>⊥</sup> Centro de Química Estrutural and Departamento de Engenharia Química, Instituto Superior Técnico Universidade de Lisboa, Av. Rovisco Pais, 1049-001 Lisbon, Portugal.

<sup>||</sup> Department of Analytical Chemistry, Faculty of Pharmacy, Wrocław Medical University, Borowska 211 A, 50-566 Wrocław, Poland.

<sup>^</sup> Research Institute of Chemistry, Peoples' Friendship University of Russia (RUDN University), 6 Miklukho-Maklaya st., 117198 Moscow, Russia.

## Table of Contents

|                                                                                                                         |   |
|-------------------------------------------------------------------------------------------------------------------------|---|
| Figure S1. PXRD patterns of compound <b>1</b> .....                                                                     | 3 |
| Figure S2. IR spectrum of <b>1</b> .....                                                                                | 4 |
| Figure S3. <sup>1</sup> H NMR spectrum of <b>1</b> (D <sub>2</sub> O).....                                              | 4 |
| Figure S4. <sup>31</sup> P{ <sup>1</sup> H} NMR spectrum of <b>1</b> (D <sub>2</sub> O).....                            | 4 |
| Figure S5. <sup>1</sup> H NMR spectrum of <b>1</b> (D <sub>2</sub> O, after one week).....                              | 5 |
| Figure S6. <sup>31</sup> P{ <sup>1</sup> H} NMR spectrum of <b>1</b> (D <sub>2</sub> O, after one week).....            | 5 |
| Figure S7. <sup>31</sup> P{ <sup>1</sup> H} NMR spectrum of <b>1</b> (DMSO- <i>d</i> <sub>6</sub> , after one day)..... | 5 |
| Figure S8. ESI-MS(+) spectrum of <b>1</b> .....                                                                         | 6 |
| Figure S9. ESI-MS(-) spectrum of <b>1</b> .....                                                                         | 6 |
| Figure S10. Oxygen uptake plot for autoxidation of micelar system without any additive.....                             | 6 |
| Figure S11. Oxygen uptake plot for autoxidation of micelar system in the presence of <b>1</b> .....                     | 7 |
| Figure S12. Oxygen uptake plot for autoxidation of micelar system in the presence of PTA.....                           | 7 |
| Figure S13. Oxygen uptake plot for autoxidation of micelar system in the presence of H <sub>2</sub> quin.....           | 8 |
| Figure S14. CD spectra of the HSA- <b>1</b> systems.....                                                                | 8 |
| Table S1. Binding and thermodynamic parameters of the interaction of HSA with <b>1</b> . .....                          | 9 |

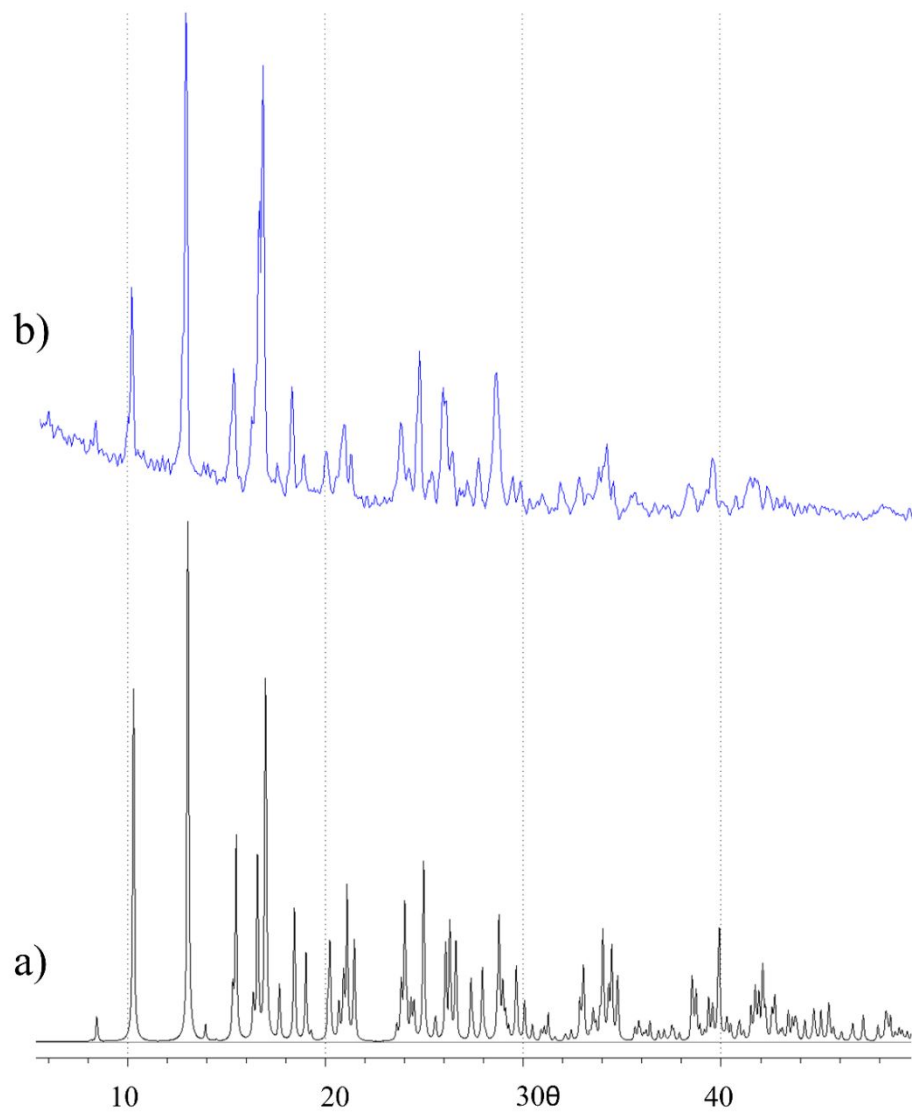

**Figure S1.** PXRD patterns of compound **1**: (a) calculated from the single crystal structure, (b) bulk microcrystalline product.

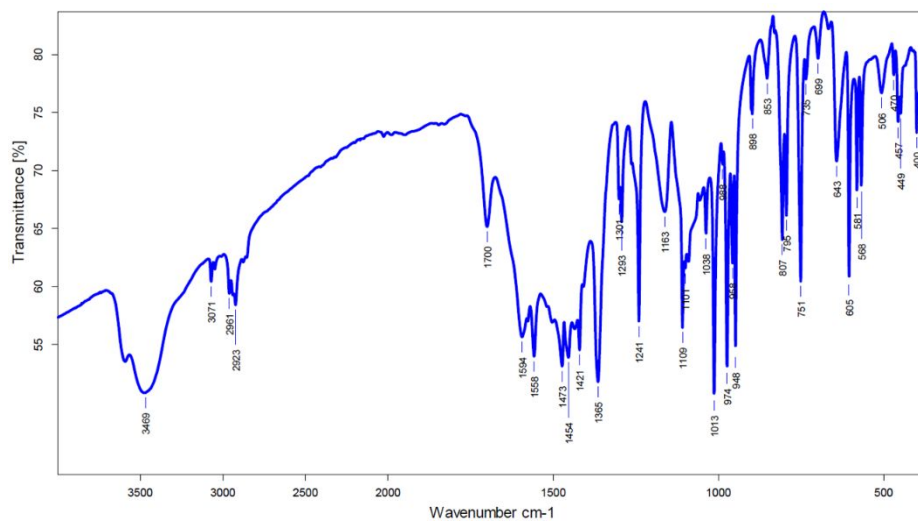

Figure S2. IR spectrum of **1**.

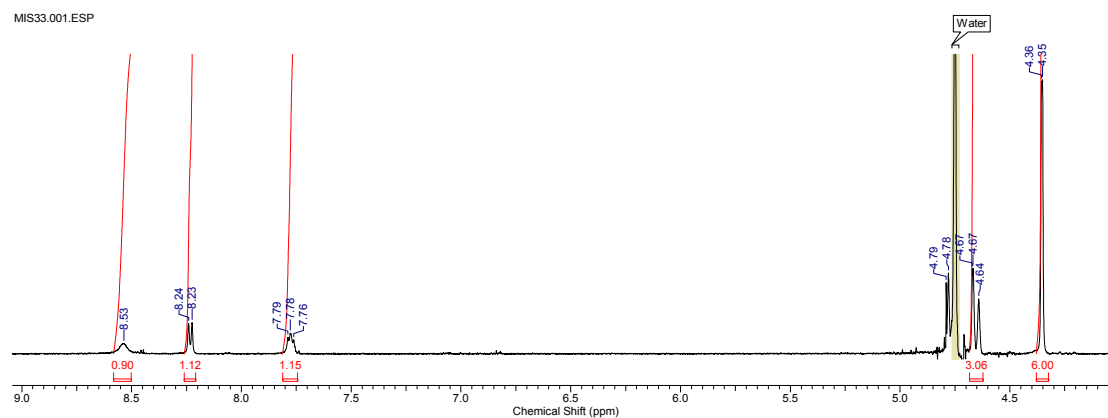

Figure S3. <sup>1</sup>H NMR spectrum of **1** (D<sub>2</sub>O, r.t., Bruker 500 AMX).

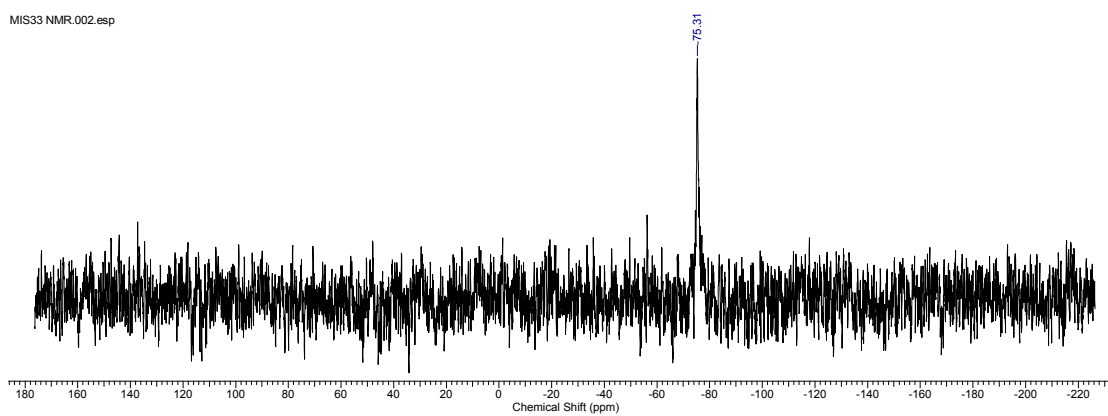

Figure S4. <sup>31</sup>P{<sup>1</sup>H} NMR spectrum of **1** (D<sub>2</sub>O, r.t., Bruker 500 AMX).

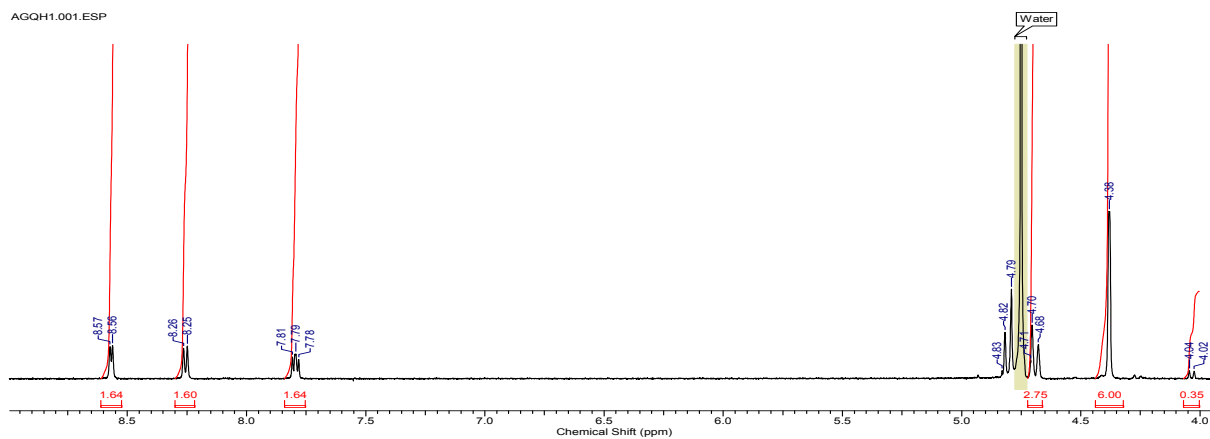

**Figure S5.**  $^1\text{H}$  NMR spectrum of **1** ( $\text{D}_2\text{O}$ , r.t., Bruker 600 AMX, after one week).

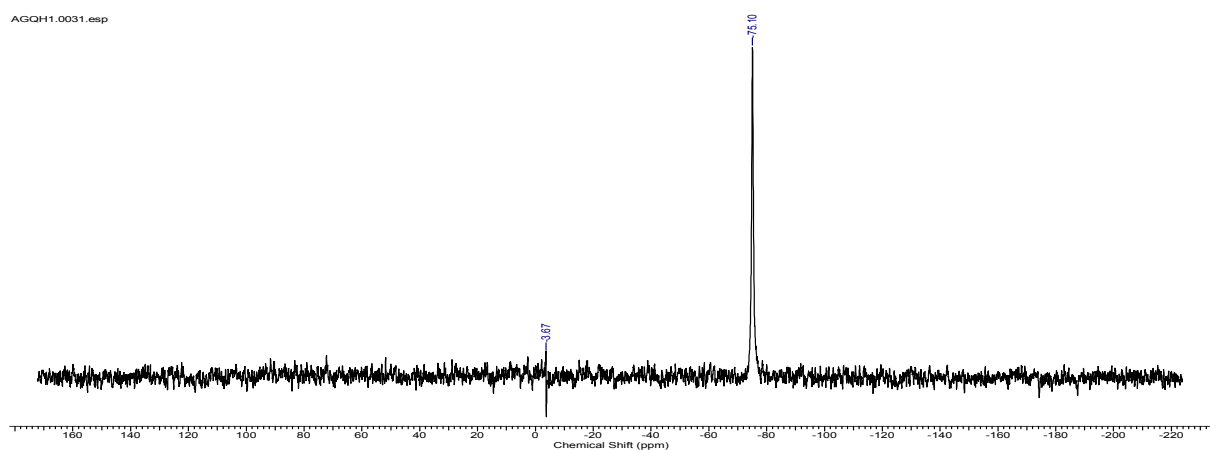

**Figure S6.**  $^{31}\text{P}\{^1\text{H}\}$  NMR spectrum of **1** ( $\text{D}_2\text{O}$ , r.t., Bruker 600 AMX, after one week).

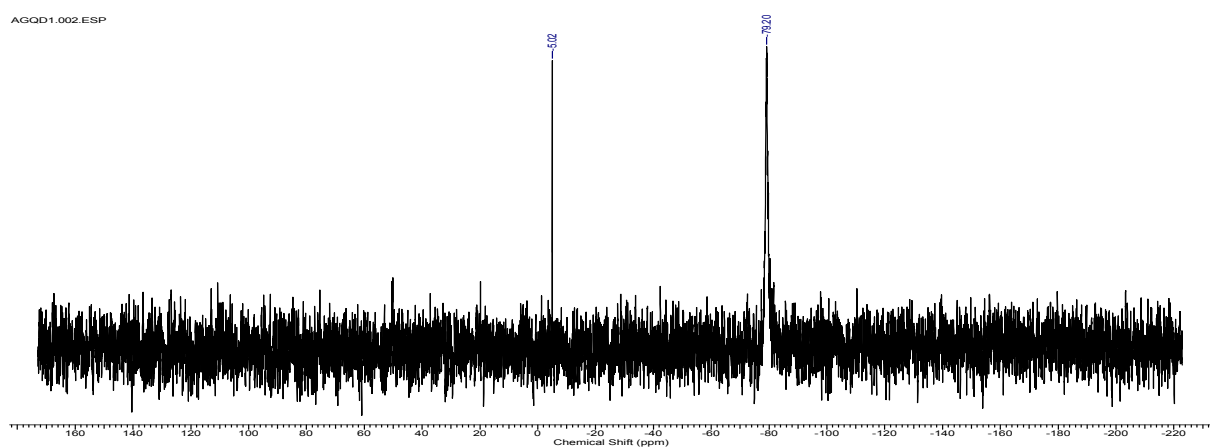

**Figure S7.**  $^{31}\text{P}\{^1\text{H}\}$  NMR spectrum of **1** ( $\text{DMSO-}d_6$ , r.t., Bruker 600 AMX, after one day).

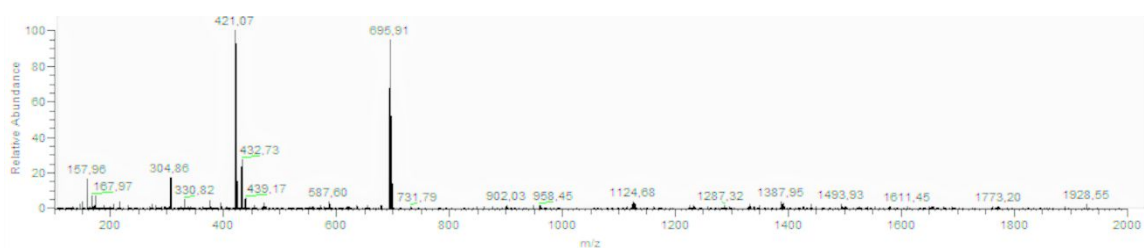

**Figure S8.** ESI-MS(+) spectrum of **1**.

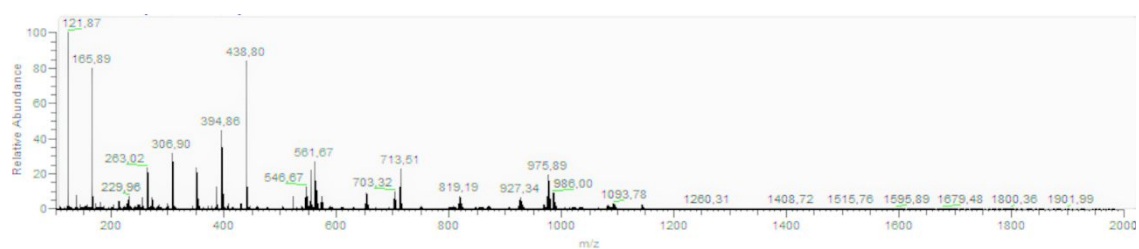

**Figure S9.** ESI-MS(-) spectrum of **1**.

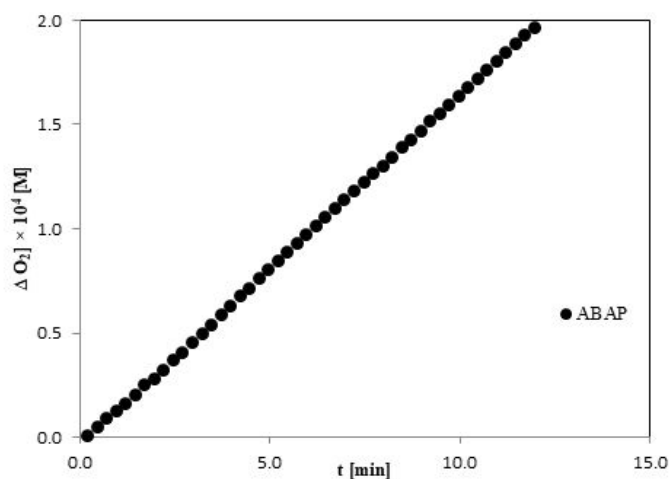

**Figure S10.** Oxygen uptake for autoxidation of micellar system initiated with ABAP at 37 °C, pH 7.0 Autoxidation without any additive. Final concentration: LinMe 2.74 mM, Triton X-100 8 mM).

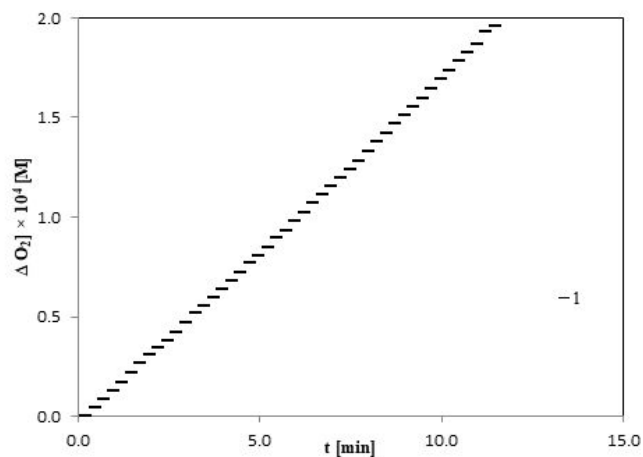

**Figure S11.** Oxygen uptake for autoxidation of micellar system initiated with ABAP at 37 °C, pH 7.0. Autoxidation in the presence of **1** (1 μM). Final concentration: LinMe 2.74 mM, Triton X-100 8 mM).

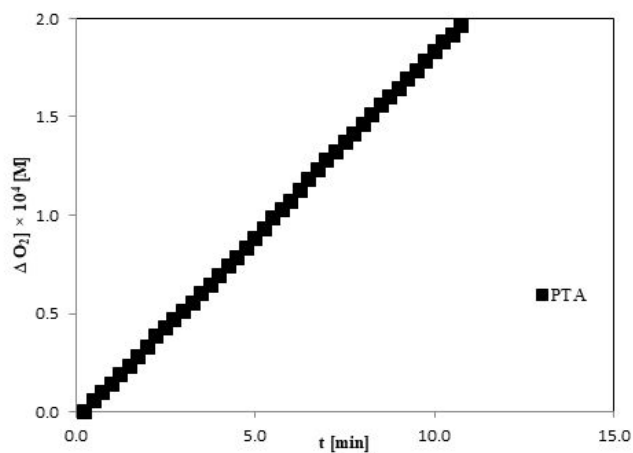

**Figure S12.** Oxygen uptake for autoxidation of micellar system initiated with ABAP at 37 °C, pH 7.0. Autoxidation in the presence of PTA (1 μM). Final concentration: LinMe 2.74 mM, Triton X-100 8 mM).

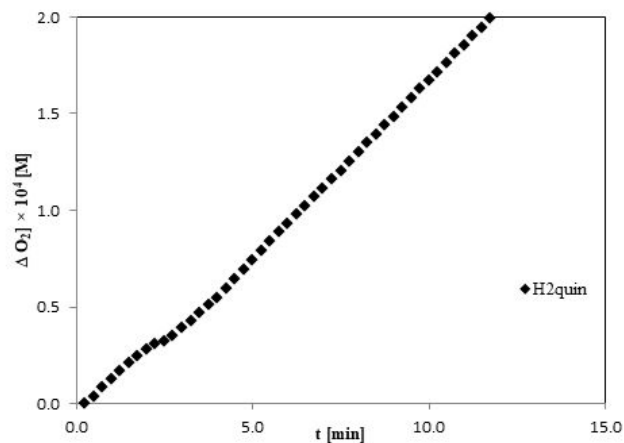

**Figure S13.** Oxygen uptake for autoxidation of micellar system initiated with ABAP at 37 °C, pH 7.0. Autoxidation in the presence of H<sub>2</sub>quin (1 μM). Final concentration: LinMe 2.74 mM, Triton X-100 8 mM).

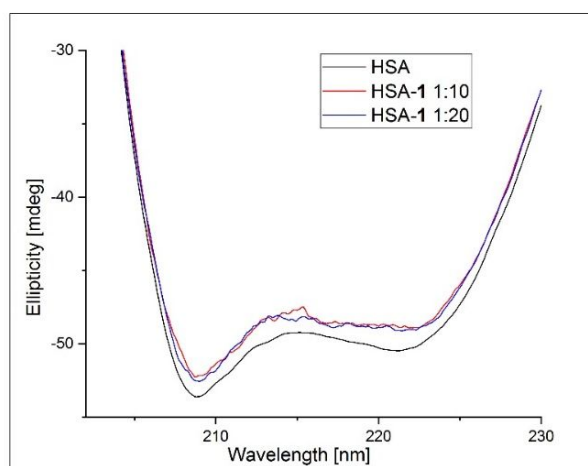

**Figure S14.** CD spectra of the HSA-1 systems. [HSA] = 4 μM, 310 K, 24 h.



**Table S1.** Binding and thermodynamic parameters of the interaction of HSA with **1**.

| $T$ [K] | $K_{sv}$ [ $M^{-1}$ ] | $K_q$ [ $M^{-1}s^{-1}$ ] | $K_a$ [ $M^{-1}$ ] | $n$   | $\Delta H$<br>[kJ/mol] | $\Delta S$ [J/mol] | $\Delta G$ [kJ/mol] |
|---------|-----------------------|--------------------------|--------------------|-------|------------------------|--------------------|---------------------|
| 298     | $3.14 \times 10^3$    | $3.14 \times 10^{11}$    | $1.19 \times 10^4$ | 1.08  | -124.17                | -338.44            | -23.27              |
| 310     | $2.06 \times 10^4$    | $2.06 \times 10^{12}$    | $1.73 \times 10^3$ | 0.891 |                        |                    | -19.20              |
